# Supplementary material
Source: PubMed Central journal article supplement (PMC4632165)

# Supplemental Figure 1.

**A**

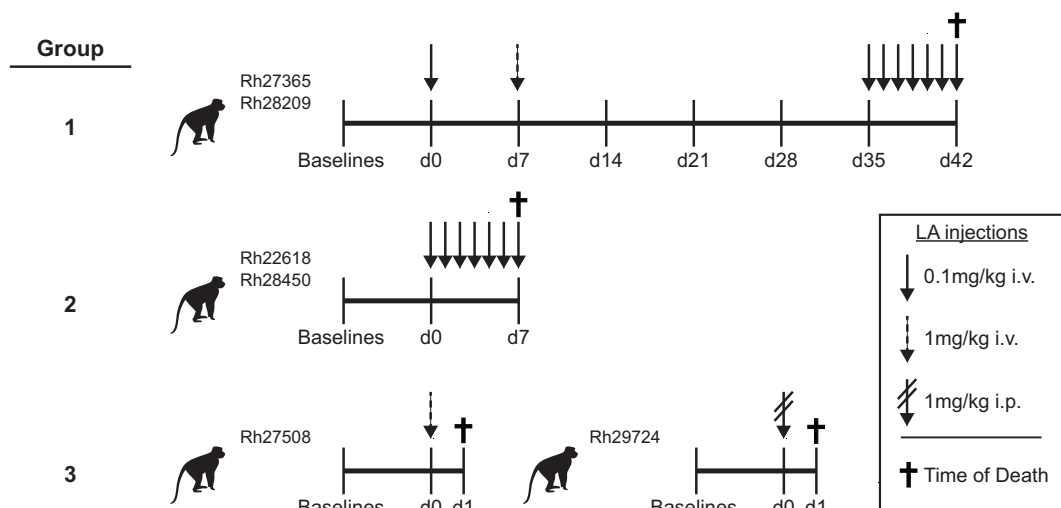

**B**

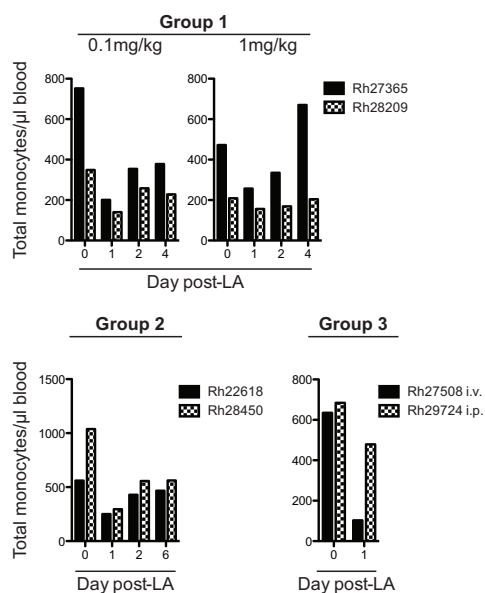

**C**

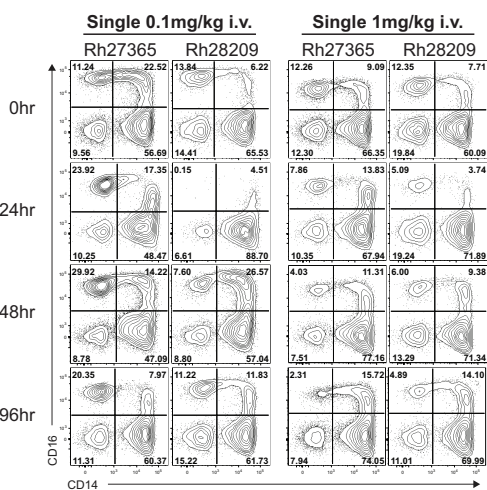

**D**

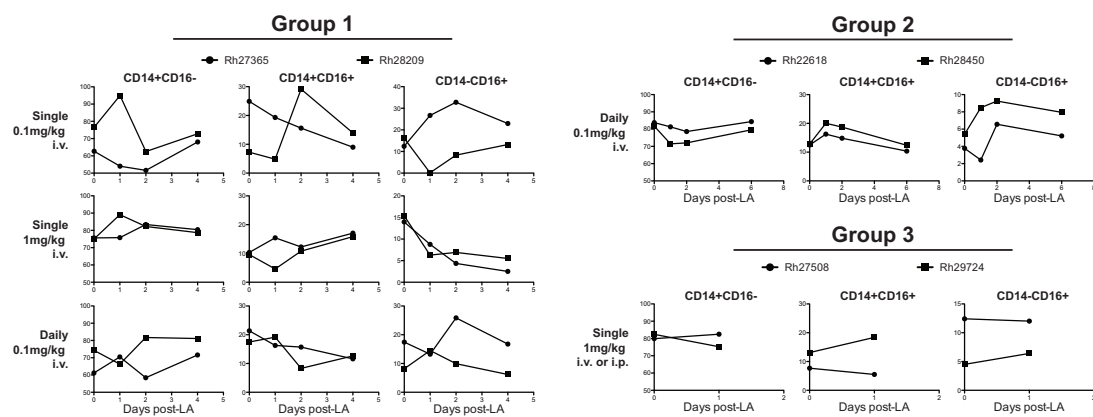

Supplement: supp_jlb.5TA0713-373R_jlb.5TA0713-373RSuppFigure1.pdf [file supp_jlb.5TA0713-373R_jlb.5TA0713-373RSuppFigure1.pdf]
